# Supplementary material for: Inpactor, Integrated and Parallel Analyzer and Classifier of LTR Retrotransposons and Its Application for Pineapple LTR Retrotransposons Diversity and Dynamics
Source: Biology (Basel). 2018 May 25;7(2):32. doi: 10.3390/biology7020032 (PMC6022998; doi:10.3390/biology7020032)
Supplement: Supplementary file 1 [file biology-07-00032-s001.zip]

Archive with 12 entries (12 files):
- Supplementary S9.pdf
- Supplementary S10.docx
- Supplementary S11.pdf
- Supplementary S12.png
- Supplementary S1.docx
- Supplementary S2.xlsx
- Supplementary S3.xlsx
- Supplementary S4.xlsx
- Supplementary S5.pdf
- Supplementary S6.pdf
- Supplementary S7.pdf
- Supplementary S8.pdf
