# Supplementary material for: Inpactor, Integrated and Parallel Analyzer and Classifier of LTR Retrotransposons and Its Application for Pineapple LTR Retrotransposons Diversity and Dynamics
Source: Biology (Basel). 2018 May 25;7(2):32. doi: 10.3390/biology7020032 (PMC6022998; doi:10.3390/biology7020032)
Supplement: Supplementary file 1 [file biology-07-00032-s001.zip › Supplementary S2.xlsx]

## Sheet: Arabidopsis thaliana
Number of Cores	Module	Average Runtime in seconds (10 Repetitions)	Standard Deviation in seconds	Percentage (Break-Down)
Sequential (1 Core)	Pre-Processing and Extraction of information	1133.52	25.4816	83.1614
	Classification	18.558	12.9549	1.36151
	Doman extraction	57.97	8.71638	4.25299
	Insertion time analysis and Phylogenetic tree creation	152.989	42.4812	11.2241
	Total Time	1363.04	23.422	100
4	Pre-Processing and Extraction of information	362.51	30.5506	81.9647
	Classification	7.805	3.57929	1.76474
	Doman extraction	23.494	6.22785	5.31207
	Insertion time analysis and Phylogenetic tree creation	48.467	10.3151	10.9585
	Total Time	442.276	29.4117	100
8	Pre-Processing and Extraction of information	180.483	42.6116	72.938
	Classification	12.386	14.9439	5.00552
	Doman extraction	17.05	13.601	6.89036
	Cleaner	37.528	20.4382	15.1661
	Total Time	247.447	62.0346	100
16	Pre-Processing and Extraction of information	74.19	1.95759	64.8758
	Classification	4.07	0.546463	3.55903
	Doman extraction	5.616	1.00127	4.91094
	Insertion time analysis and Phylogenetic tree creation	30.481	2.83927	26.6542
	Total Time	114.36	3.02439	100
32	Pre-Processing and Extraction of information	82.113	2.03906	65.4141
	Classification	6.064	0.25687	4.83079
	Doman extraction	6.189	0.652831	4.93037
	Insertion time analysis and Phylogenetic tree creation	31.162	2.09461	24.8247
	Total Time	125.528	2.62211	100

## Sheet: Oryza sativa
Number of Cores	Module	Average Runtime in seconds (10 Repetitions)	Standard Deviation in seconds	Percentage (Break-Down)
Sequential (1 Core)	Pre-Proccesing and Extraction of information	16331.4	244.208	77.965
	Classification	138.151	11.754	0.659523
	Doman extraction	1142.07	48.4858	5.45215
	Insertion time analysis and Phylogenetic tree creation	3335.47	266.55	15.9233
	Total Time	20947.1	434.02	100
4	Pre-Proccesing and Extraction of information	4684.35	165.454	81.5154
	Classification	73.962	1.57689	1.28706
	Doman extraction	377.768	16.5396	6.57378
	Insertion time analysis and Phylogenetic tree creation	610.506	33.6374	10.6238
	Total Time	5746.59	172.774	100
8	Pre-Proccesing and Extraction of information	1897.04	21.9693	74.6082
	Classification	28.942	3.9573	1.13825
	Doman extraction	127.244	9.11243	5.00436
	Cleaner	489.443	31.5966	19.2492
	Total Time	2542.66	30.6644	100
16	Pre-Proccesing and Extraction of information	979.043	10.3758	64.4295
	Classification	34.116	5.35389	2.24513
	Doman extraction	70.408	4.34126	4.63345
	Insertion time analysis and Phylogenetic tree creation	435.991	31.9797	28.692
	Total Time	1519.56	36.438	100
32	Pre-Proccesing and Extraction of information	946.137	80.8488	65.3705
	Classification	48.317	10.5533	3.33832
	Doman extraction	67.39	8.6749	4.65611
	Insertion time analysis and Phylogenetic tree creation	385.501	25.3429	26.635
	Total Time	1447.34	100.282	100

## Sheet: Coffea canephora
Number of Cores	Module	Average Runtime in seconds (10 Repetitions)	Standard Deviation in seconds	Percentage (Break-Down)
Sequential (1 Core)	Pre-Processing and Extraction of information	37569.1	2086.96	84.2387
	Classification	571.976	40.988	1.2825
	Doman extraction	2572.99	145.66	5.76925
	Insertion time analysis and Phylogenetic tree creation	3884.34	883.147	8.7096
	Total Time	44598.4	2233.31	100
4	Pre-Processing and Extraction of information	3755.5	314.119	84.557
	Classification	82.653	91.6238	1.86098
	Doman extraction	250.885	114.689	5.64881
	Insertion time analysis and Phylogenetic tree creation	352.346	84.6367	7.93325
	Total Time	4441.38	328.009	100
8	Pre-Processing and Extraction of information	2063.06	199.033	85.0572
	Classification	34.537	26.118	1.42392
	Doman extraction	84.937	13.6667	3.50184
	Cleaner	242.963	54.9857	10.0171
	Total Time	2425.49	173.26	100
16	Pre-Processing and Extraction of information	685.944	70.2464	63.5257
	Classification	33.634	10.874	3.11486
	Doman extraction	51.123	29.3843	4.73453
	Insertion time analysis and Phylogenetic tree creation	309.089	54.7031	28.6249
	Total Time	1079.79	73.1757	100
32	Pre-Processing and Extraction of information	681.396	36.0706	68.806
	Classification	42.614	6.27772	4.30308
	Doman extraction	42.387	1.37626	4.28015
	Insertion time analysis and Phylogenetic tree creation	223.918	40.7526	22.6108
	Total Time	990.315	46.0918	100

## Sheet: Zea mays
Number of Cores	Module	Average Runtime in seconds (10 Repetitions)	Standard Deviation in seconds	Percentage (Break-Down)
Sequential (1 Core)	Pre-Processing and Extraction of information	117610	5931.11	49.0702
	Classification	1908.22	745.408	0.796165
	Doman extraction	13024.2	1449.97	5.43408
	Insertion time analysis and Phylogenetic tree creation	107135	4200.11	44.6996
	Total Time	239677	2871.91	100
4	Pre-Processing and Extraction of information	15507	1426.23	54.6189
	Classification	216.091	57.6811	0.761117
	Doman extraction	1587.26	214.932	5.59065
	Insertion time analysis and Phylogenetic tree creation	11080.9	1223.23	39.0293
	Total Time	28391.3	945.514	100
8	Pre-Processing and Extraction of information	6147.79	674.669	52.697
	Classification	108.166	33.0774	0.927166
	Doman extraction	549.712	46.4761	4.71197
	Insertion time analysis and Phylogenetic tree creation	4860.63	767.352	41.6639
	Total Time	11666.3	833.235	100
16	Pre-Processing and Extraction of information	3142.51	326.414	41.8266
	Classification	139.275	58.7405	1.85374
	Doman extraction	342.645	124.213	4.56058
	Insertion time analysis and Phylogenetic tree creation	3888.76	383.636	51.7591
	Total Time	7513.19	289.85	100
32	Pre-Processing and Extraction of information	2534.36	217.785	31.7564
	Classification	142.462	5.74803	1.78509
	Doman extraction	203.593	10.8254	2.55108
	Insertion time analysis and Phylogenetic tree creation	5100.23	561.449	63.9075
	Total Time	7980.65	475.824	100

## Sheet: PineApple
Number of Cores	Module	Average Runtime in seconds (10 Repetitions)	Standard Deviation in seconds	Percentage (Break-Down)
Sequential (1 Core)	Pre-Processing and Extraction of information	2976.61	23.9338	85.5131
	Classification	35.21	0.0687992	1.01153
	Doman extraction	184.762	6.55116	5.30792
	Insertion time analysis and Phylogenetic tree creation	284.3	21.2113	8.16747
	Total Time	3480.88	25.3137	100
4	Pre-Processing and Extraction of information	1300.47	60.5414	82.9888
	Classification	19.18	5.47458	1.22396
	Doman extraction	85.2225	18.6098	5.43844
	Insertion time analysis and Phylogenetic tree creation	162.17	41.6928	10.3488
	Total Time	1567.04	90.3614	100
8	Pre-Processing and Extraction of information	545.293	7.88082	81.05
	Classification	9.37	2.10718	1.39272
	Doman extraction	35.4625	4.59478	5.271
	Insertion time analysis and Phylogenetic tree creation	82.66	9.78194	12.2862
	Total Time	672.785	12.4939	100
16	Pre-Processing and Extraction of information	270.167	0.204042	71.8873
	Classification	11.58	0.21166	3.08126
	Doman extraction	18.2533	0.646555	4.85694
	Insertion time analysis and Phylogenetic tree creation	75.82	16.6599	20.1746
	Total Time	375.82	16.7607	100
32	Pre-Processing and Extraction of information	303.573	9.39556	68.924
	Classification	16.9433	0.70088	3.84685
	Doman extraction	23.1233	0.120554	5.24997
	Insertion time analysis and Phylogenetic tree creation	96.8067	7.28615	21.9792
	Total Time	440.447	13.6651	100
