# Supplementary material for: Inpactor, Integrated and Parallel Analyzer and Classifier of LTR Retrotransposons and Its Application for Pineapple LTR Retrotransposons Diversity and Dynamics
Source: Biology (Basel). 2018 May 25;7(2):32. doi: 10.3390/biology7020032 (PMC6022998; doi:10.3390/biology7020032)
Supplement: Supplementary file 1 [file biology-07-00032-s001.zip › Supplementary S3.xlsx]

## Sheet: Initial Classification
Class	Arabidopsis thaliana	Oryza sativa	Coffea canephora	Zea mays
Gypsy	57	1171	574	2585
Copia	64	419	486	1956
TRIM	9	37	46	42
LARD	33	458	257	493
TR_GAG	32	267	380	1472
NO-CLASS	3	13	24	77
TOTAL	198	2365	1767	6625

## Sheet: Classification into lineages
Class	Family	Arabidopsis thaliana	Oryza sativa	Coffea canephora	Zea mays
COPIA	Bianca	2	3	44	8
	Oryco	18	75	35	34
	Retrofit	19	82	123	76
	Sire	7	62	105	1737
	Tork	13	180	142	78
GYPSY	Athila	10	6	93	0
	CRM	3	34	76	84
	Del	13	280	103	388
	Galadriel	0	0	7	0
	Reina	9	93	115	137
	TAT	21	746	177	1970
	Unkown	6	29	40	29
