# Supplementary material for: Inpactor, Integrated and Parallel Analyzer and Classifier of LTR Retrotransposons and Its Application for Pineapple LTR Retrotransposons Diversity and Dynamics
Source: Biology (Basel). 2018 May 25;7(2):32. doi: 10.3390/biology7020032 (PMC6022998; doi:10.3390/biology7020032)
Supplement: Supplementary file 1 [file biology-07-00032-s001.zip › Supplementary S4.xlsx]

## Sheet: Copia
Age	Arabidopsis thaliana	Oryza sativa	Coffea canephora	Zea mays
1-500000	19	167	44	931
500001-1000001	15	64	84	491
1000001-1500001	11	65	75	233
1500001-2000001	4	44	81	135
2000001-2500001	1	27	54	58
2500001-3000001	0	4	40	15
3000001-3500001	1	3	35	9
3500001-4000001	0	1	28	3
4000001-4500001	0	2	13	3
4500001-5000001	0	0	9	2
5000001-5500001	0	2	7	0
5500001-6000001	1	0	4	1
6000001-6500001	1	0	2	3
6500001-7000001	0	0	0	1
7000001-7500001	0	0	0	2
7500001-8000001	0	0	0	1
8000001-8500001	0	0	0	0
8500001-9000001	0	0	0	0
9000001-9500001	0	0	0	0
9500001-10000001	0	0	0	1

## Sheet: Gypsy
Age	Arabidopsis thaliana	Oryza sativa	Coffea canephora	Zea mays
1-500000	10	591	67	1012
500001-1000001	10	168	128	614
1000001-1500001	15	149	98	367
1500001-2000001	8	83	87	276
2000001-2500001	6	38	67	95
2500001-3000001	4	17	50	36
3000001-3500001	1	5	26	15
3500001-4000001	1	4	19	10
4000001-4500001	0	6	13	6
4500001-5000001	0	0	7	5
5000001-5500001	1	1	1	2
5500001-6000001	0	1	2	3
6000001-6500001	0	0	1	2
6500001-7000001	0	0	2	0
7000001-7500001	0	1	0	0
7500001-8000001	0	1	0	0
8000001-8500001	0	0	0	0
8500001-9000001	0	0	0	0
9000001-9500001	0	0	0	0
9500001-10000001	0	0	0	0
