# Supplementary material for: Inpactor, Integrated and Parallel Analyzer and Classifier of LTR Retrotransposons and Its Application for Pineapple LTR Retrotransposons Diversity and Dynamics
Source: Biology (Basel). 2018 May 25;7(2):32. doi: 10.3390/biology7020032 (PMC6022998; doi:10.3390/biology7020032)
Supplement: Supplementary file 1 [file biology-07-00032-s001.zip › Supplementary S11.pdf]

|                   | LG1   | LG2   | LG3   | LG4   | LG5   | LG6   | LG7   | LG8   | LG9   | LG10  | LG11  | LG12  | LG13  | LG14  | LG15  | LG16  | LG17  | LG18  | LG19  | LG20  | LG21  | LG22  | LG23  | LG24  | LG25  |
|-------------------|-------|-------|-------|-------|-------|-------|-------|-------|-------|-------|-------|-------|-------|-------|-------|-------|-------|-------|-------|-------|-------|-------|-------|-------|-------|
| RLC-<br>NO_FAMILY | 0,07  | 0,05  | 0,05  | 0,03  | 0,04  | 0,11  | 0,06  | 0,07  | 0,04  | 0,03  | 0,02  | 0,05  | 0,06  | 0,02  | 0,04  | 0,04  | 0,03  | 0,03  | 0,02  | 0,07  | 0,03  | 0,03  | 0,02  | 0,03  | 0,00  |
| RLC-ORYCO         | 0,09  | 0,14  | 0,16  | 0,11  | 0,10  | 0,04  | 0,14  | 0,07  | 0,15  | 0,10  | 0,10  | 0,12  | 0,12  | 0,15  | 0,14  | 0,21  | 0,16  | 0,26  | 0,06  | 0,12  | 0,12  | 0,09  | 0,22  | 0,15  | 0,03  |
| RLC-<br>RETROFIT  | 0,33  | 0,32  | 0,38  | 0,27  | 0,34  | 0,38  | 0,33  | 0,35  | 0,35  | 0,16  | 0,49  | 0,31  | 0,45  | 0,32  | 0,34  | 0,20  | 0,24  | 0,45  | 0,22  | 0,41  | 0,18  | 0,30  | 0,29  | 0,20  | 0,17  |
| RLC-SIRE          | 0,77  | 1,07  | 0,88  | 0,56  | 0,78  | 0,83  | 0,50  | 0,81  | 0,71  | 0,82  | 0,41  | 0,60  | 0,73  | 0,41  | 0,47  | 0,88  | 0,75  | 0,83  | 1,00  | 0,92  | 1,13  | 0,57  | 0,59  | 1,10  | 0,12  |
| RLC-TORK          | 1,04  | 1,08  | 1,36  | 0,90  | 1,21  | 1,12  | 1,22  | 1,19  | 1,13  | 1,27  | 1,38  | 1,21  | 1,09  | 1,06  | 0,88  | 1,49  | 1,05  | 0,93  | 1,04  | 1,34  | 1,39  | 1,06  | 1,14  | 1,38  | 0,81  |
| RLG-CRM           | 0,99  | 1,16  | 0,90  | 0,95  | 0,94  | 1,21  | 0,84  | 1,17  | 1,01  | 1,15  | 1,00  | 1,17  | 1,10  | 1,04  | 1,15  | 1,01  | 1,29  | 0,96  | 0,98  | 1,20  | 0,99  | 1,19  | 0,86  | 1,19  | 0,78  |
| RLG-DEL           | 15,53 | 14,48 | 13,70 | 11,69 | 12,15 | 14,57 | 14,61 | 11,68 | 12,06 | 13,80 | 14,51 | 11,62 | 15,28 | 12,39 | 13,41 | 14,34 | 11,48 | 13,04 | 15,47 | 14,45 | 13,56 | 13,63 | 13,48 | 18,65 | 4,74  |
| RLG-<br>GALADRIEL | 0,06  | 0,05  | 0,12  | 0,03  | 0,06  | 0,07  | 0,03  | 0,06  | 0,05  | 0,14  | 0,10  | 0,12  | 0,09  | 0,06  | 0,15  | 0,15  | 0,07  | 0,03  | 0,03  | 0,08  | 0,07  | 0,02  | 0,23  | 0,13  | 0,07  |
| RLG-REINA         | 0,54  | 0,33  | 0,48  | 0,39  | 0,41  | 0,52  | 0,38  | 0,36  | 0,31  | 0,26  | 0,52  | 0,28  | 0,48  | 0,37  | 0,42  | 0,26  | 0,30  | 0,38  | 0,38  | 0,49  | 0,29  | 0,29  | 0,45  | 0,38  | 0,31  |
| RLG-TAT           | 1,79  | 1,10  | 1,01  | 1,03  | 1,11  | 1,28  | 0,96  | 1,26  | 1,77  | 0,91  | 1,28  | 0,97  | 1,02  | 1,09  | 0,81  | 1,32  | 1,59  | 1,16  | 1,25  | 1,08  | 1,44  | 1,03  | 1,12  | 1,70  | 0,20  |
| RXX               | 0,52  | 0,45  | 0,43  | 0,41  | 0,52  | 0,53  | 0,51  | 0,47  | 0,53  | 0,68  | 0,48  | 0,53  | 0,51  | 0,52  | 0,46  | 0,56  | 0,50  | 0,45  | 0,46  | 0,50  | 0,59  | 0,60  | 0,45  | 0,49  | 0,53  |
| TR-GAG            | 6,93  | 6,25  | 6,64  | 5,79  | 6,62  | 7,27  | 6,22  | 6,12  | 6,67  | 6,67  | 7,01  | 7,10  | 7,42  | 6,70  | 7,12  | 7,47  | 6,57  | 6,76  | 6,86  | 7,02  | 6,55  | 6,38  | 6,91  | 7,78  | 2,94  |
| Total             | 28,66 | 26,48 | 26,11 | 22,16 | 24,28 | 27,93 | 25,80 | 23,61 | 24,78 | 25,99 | 27,30 | 24,08 | 28,35 | 24,13 | 25,39 | 27,93 | 24,03 | 25,28 | 27,77 | 27,68 | 26,34 | 25,19 | 25,76 | 33,18 | 10,70 |
